# Supplementary material
Source: PubMed Central journal article supplement (PMC3557066)
Supplement: 1212656110_pnas.201212656SI.pdf [file 1212656110_pnas.201212656SI.pdf]

# Supporting Information

Rinne et al. 10.1073/pnas.1212656110

## SI Methods

**Fluorescence Microscopy and Electrophysiology.** FRET signals between CFP and YFP were recorded from single cells using an inverted microscope (Axiovert 135; Carl Zeiss) equipped with an oil-immersion objective (A-plan 100 $\times$ /1.25, Carl Zeiss), a Polychrome V light source, and a dual-emission photometry system (both TILL Photonics). CFP was excited with brief light flashes (duration, 5 ms; frequency, 1 or 5 Hz) at  $\lambda = 425$  nm to limit photobleaching (excitation filter: ET436/20, beamsplitter: DCLP460). Emitted donor fluorescence ( $F_{480}$ ) and acceptor fluorescence ( $F_{535}$ ) were collected with photodiodes (beam-splitter: DCLP505; emission filters D480/40 and HQ535/30, respectively) and digitalized with a computer interface (ITC16; HEKA Elektronik). Individual traces representing  $F_{535}$  and  $F_{480}$  were acquired at 1- or 5-Hz sampling rate and displayed on a personal computer using Patchmaster software (v2X52; HEKA). FRET was calculated as ratio  $F_{535}/F_{480}$  (termed FRET ratio) and corrected for photobleaching (Fig. S1). All beam-splitters or filters were from Chroma Technology.

Patch pipettes of 3 M $\Omega$  to 5 M $\Omega$  resistance were obtained using borosilicate glass capillaries (GL150F-10; Harvard Apparatus) with a horizontal pipette puller (P87; Sutter Instruments). Measurements were performed using the whole-cell configuration and cells were clamped to a holding potential ( $V_{\text{hold}}$ ) of  $-90$  mV or various test potentials with an EPC-7 amplifier (HEKA) in the voltage-clamp mode. Whole-cell G protein-activated inwardly rectifying K<sup>+</sup> (GIRK) currents were recorded at room temperature in the inward direction ( $V_{\text{hold}}$ :  $-40$  mV or  $-100$  mV,  $E_K = 0$  mV) (Fig. S2). Recording of inward currents was chosen over measuring outward currents, because the degree of inward rectification (limiting outward current amplitudes) depends on the amount of activated G proteins, and is therefore different between low- and high-agonist concentrations at positive membrane potentials. In contrast, current amplitudes that are measured in the inward direction are not affected by this phenomenon (1). During experiments, cells were continuously superfused with extracellular buffer or agonist-containing solution (see below) using a pressurized perfusion system (ALA Scientific Instruments) that allows for rapid ( $< 10$  ms) exchange of solutions. The membrane potential  $V_M$  and application of agonists were controlled and synchronized with Patchmaster software.

**Chemicals and Solutions.** The extracellular buffer was composed of: NaCl 137 mM, CaCl<sub>2</sub> 2 mM, KCl 5.4 mM, MgCl<sub>2</sub> 1 mM, Hepes 10 mM (pH = 7.4). Patch pipettes were filled with intracellular solution consisting of: K<sup>+</sup>-aspartate 100 mM, KCl 40 mM, NaCl 5 mM, MgCl<sub>2</sub> 7 mM, EGTA 10 mM, GTP 0.025 mM, Na<sup>+</sup>-ATP 5 mM, Hepes 20 mM (pH = 7.2). After a stable seal was formed and before agonists were applied, cells were superfused with extracellular buffer that was nominally Ca<sup>2+</sup>-free to prevent Ca<sup>2+</sup>-activated chloride influx during membrane depolarization, which quenches YFP fluorescence (2, 3). For GIRK current measurements, a high K<sup>+</sup>-buffer was used as extracellular solution (as above, but containing 140 mM K<sup>+</sup> and 2.4 mM Na<sup>+</sup>). For measurements using GTP $\gamma$ S, a modified pipette solution was used where GTP was replaced with 500  $\mu$ M GTP $\gamma$ S. Solutions containing norepinephrine (NE) or clonidine were prepared with Ca<sup>2+</sup>-free buffer. All chemicals were from Sigma-Aldrich or Tocris Bioscience.

**Analysis of Charge Movements, Activation Kinetics, and Concentration-Dependent Responses.** The voltage-dependence of gating-charge movement was determined by fitting a single Boltzmann function to the normalized degree of receptor activation ( $R$ ) values (Fig. 1E) with Origin 8.1 software (OriginLab). The equation used to fit the data were  $R = R_{\text{max}}/(1 + \exp[-(V - V_{0.5})/k])$ , where  $R_{\text{max}}$  is the maximal receptor activation,  $V$  the membrane potential,  $V_{0.5}$  the voltage for half-maximal effect on receptor activation, and  $k$  the slope factor. The Boltzmann fit was performed using GraphPad Prism software (v5; GraphPad Prism Software).

To determine the kinetics of receptor activation by agonists or voltage, corresponding time constants  $\tau$  were calculated by fitting the FRET response of receptor activation (indicated in Fig. 2) to a first-order exponential decay. Curve fitting and calculation of  $\tau$ -values was performed using Origin 8.1 software.

To obtain concentration-response curves, the FRET amplitudes of  $\alpha_{2A}$ AR-cam in response to a given NE concentration were measured at  $-90$  mV and  $+60$  mV and normalized to the corresponding amplitudes of the same cell evoked by 100  $\mu$ M NE at both potentials (FRET/FRET<sub>100 $\mu$ M</sub>), which was defined as maximal response. These normalized amplitudes were then plotted against (NE). Sigmoid curve fitting and calculation of EC<sub>50</sub> values was performed with GraphPad Prism.

1. Hommers LG, Lohse MJ, Bünemann M (2003) Regulation of the inward rectifying properties of G-protein-activated inwardly rectifying K<sup>+</sup> (GIRK) channels by G $\beta$  subunits. *J Biol Chem* 278(2):1037–1043.
2. Elsliger M-A, Wachter RM, Hanson GT, Kallio K, Remington SJ (1999) Structural and spectral response of green fluorescent protein variants to changes in pH. *Biochemistry* 38(17):5296–5301.

3. Wachter RM, Remington SJ (1999) Sensitivity of the yellow variant of green fluorescent protein to halides and nitrate. *Curr Biol* 9(17):R628–R629.





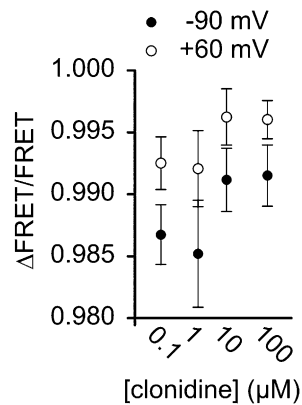

**Fig. 54.** Absolute FRET responses of clonidine-activated  $\alpha_{2A}$ AR-cam. FRET amplitudes of HEK 293 cells expressing  $\alpha_{2A}$ AR-cam were measured at  $-90$  mV and at  $+60$  mV as depicted in Fig. 3B. All cells displayed strong reduction in the FRET response at  $+60$  mV, independent of the clonidine concentration that was used to activate the biosensor.

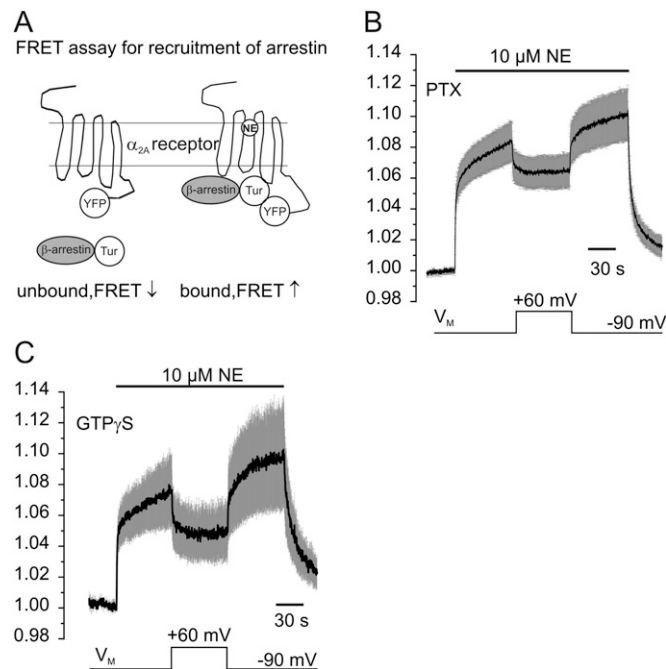

**Fig. 55.** Voltage-dependent recruitment of arrestin does not depend on  $G_i$  proteins. (A) Schematic representation of a FRET assay that uses  $\alpha_{2A}$ AR-YFP and Turquoise- $\beta$ -arrestin to report arrestin recruitment. (B and C) Application of NE at  $-90$  mV resulted in a rise in the FRET signal, indicating binding of arrestin to the  $\alpha_{2A}$ AR. Upon depolarization of the membrane, which deactivates the receptor, a reversible decrease of the FRET ratio (reflecting dissociation of arrestin from the receptor) was observed. This voltage dependence of  $\alpha_{2A}$ AR-YFP was not dependent on  $G_i$  proteins, because it was not abolished in PTX-treated cells (B) or in cells that were loaded with  $GTP\gamma S$  (C).
